# Supplementary figures and images for: AT-Hook Transcription Factors Show Functions in Liriodendron chinense under Drought Stress and Somatic Embryogenesis
Source: MDPI journal article supplement (doi:10.3390/plants12061353), 2023-03-17

A

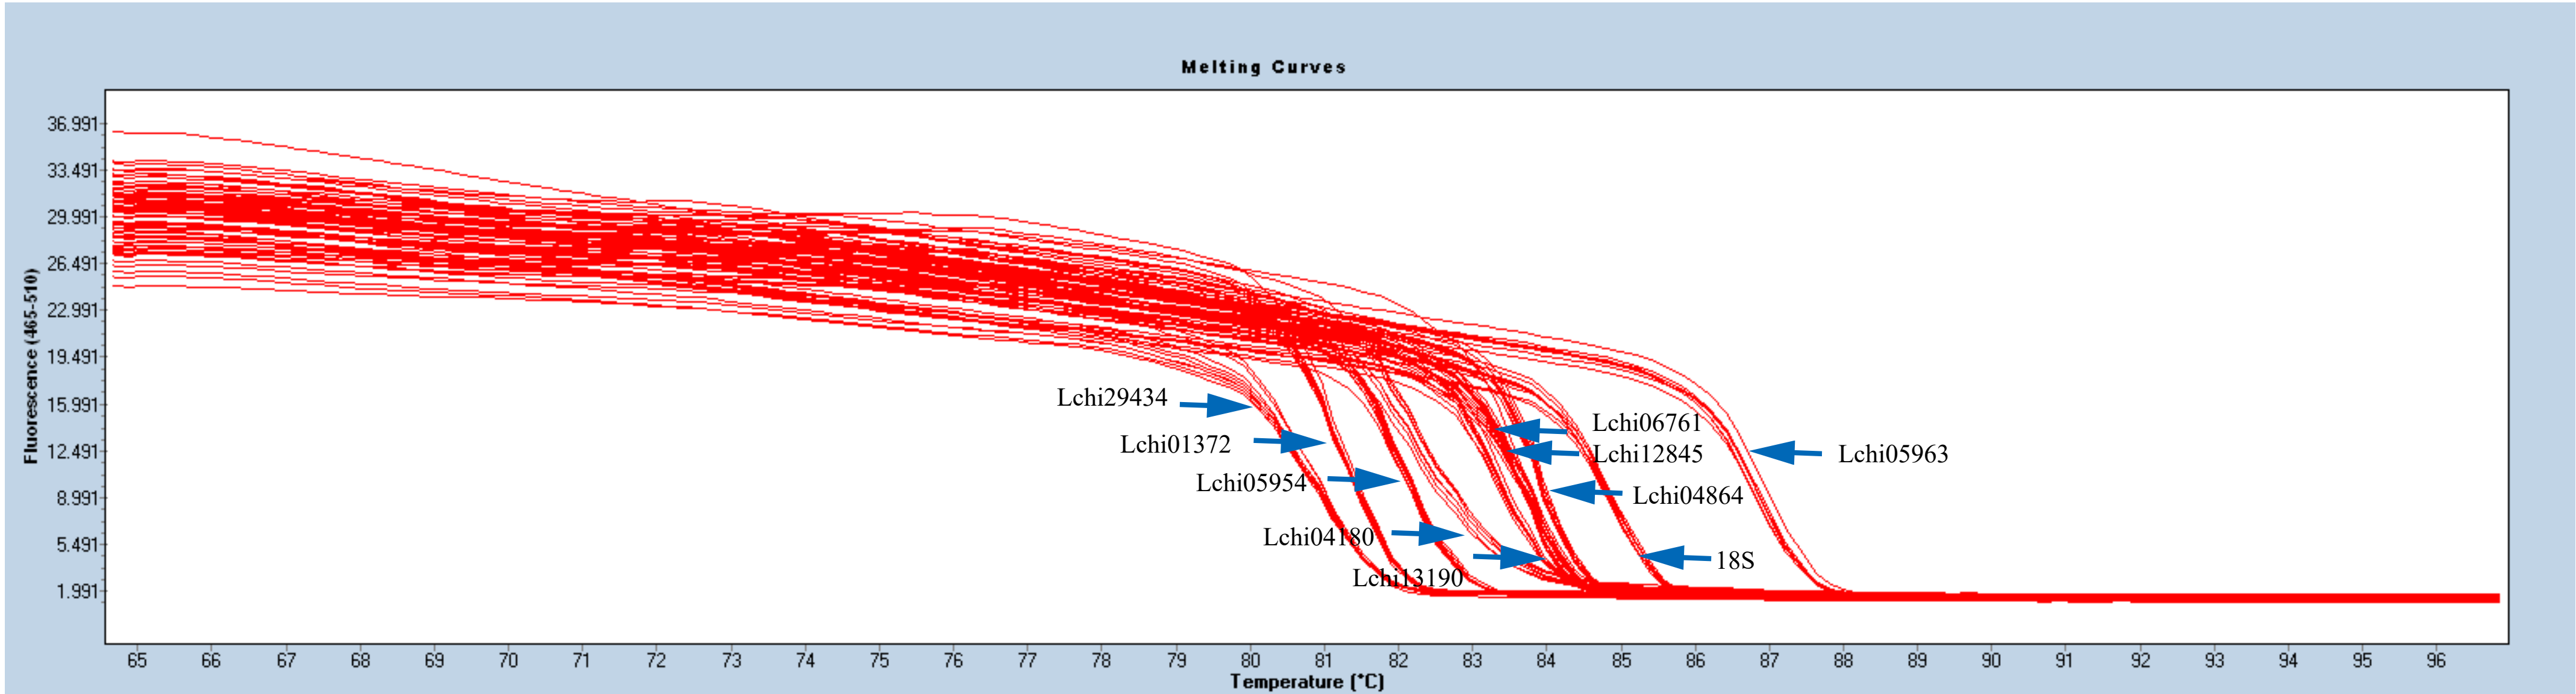

B

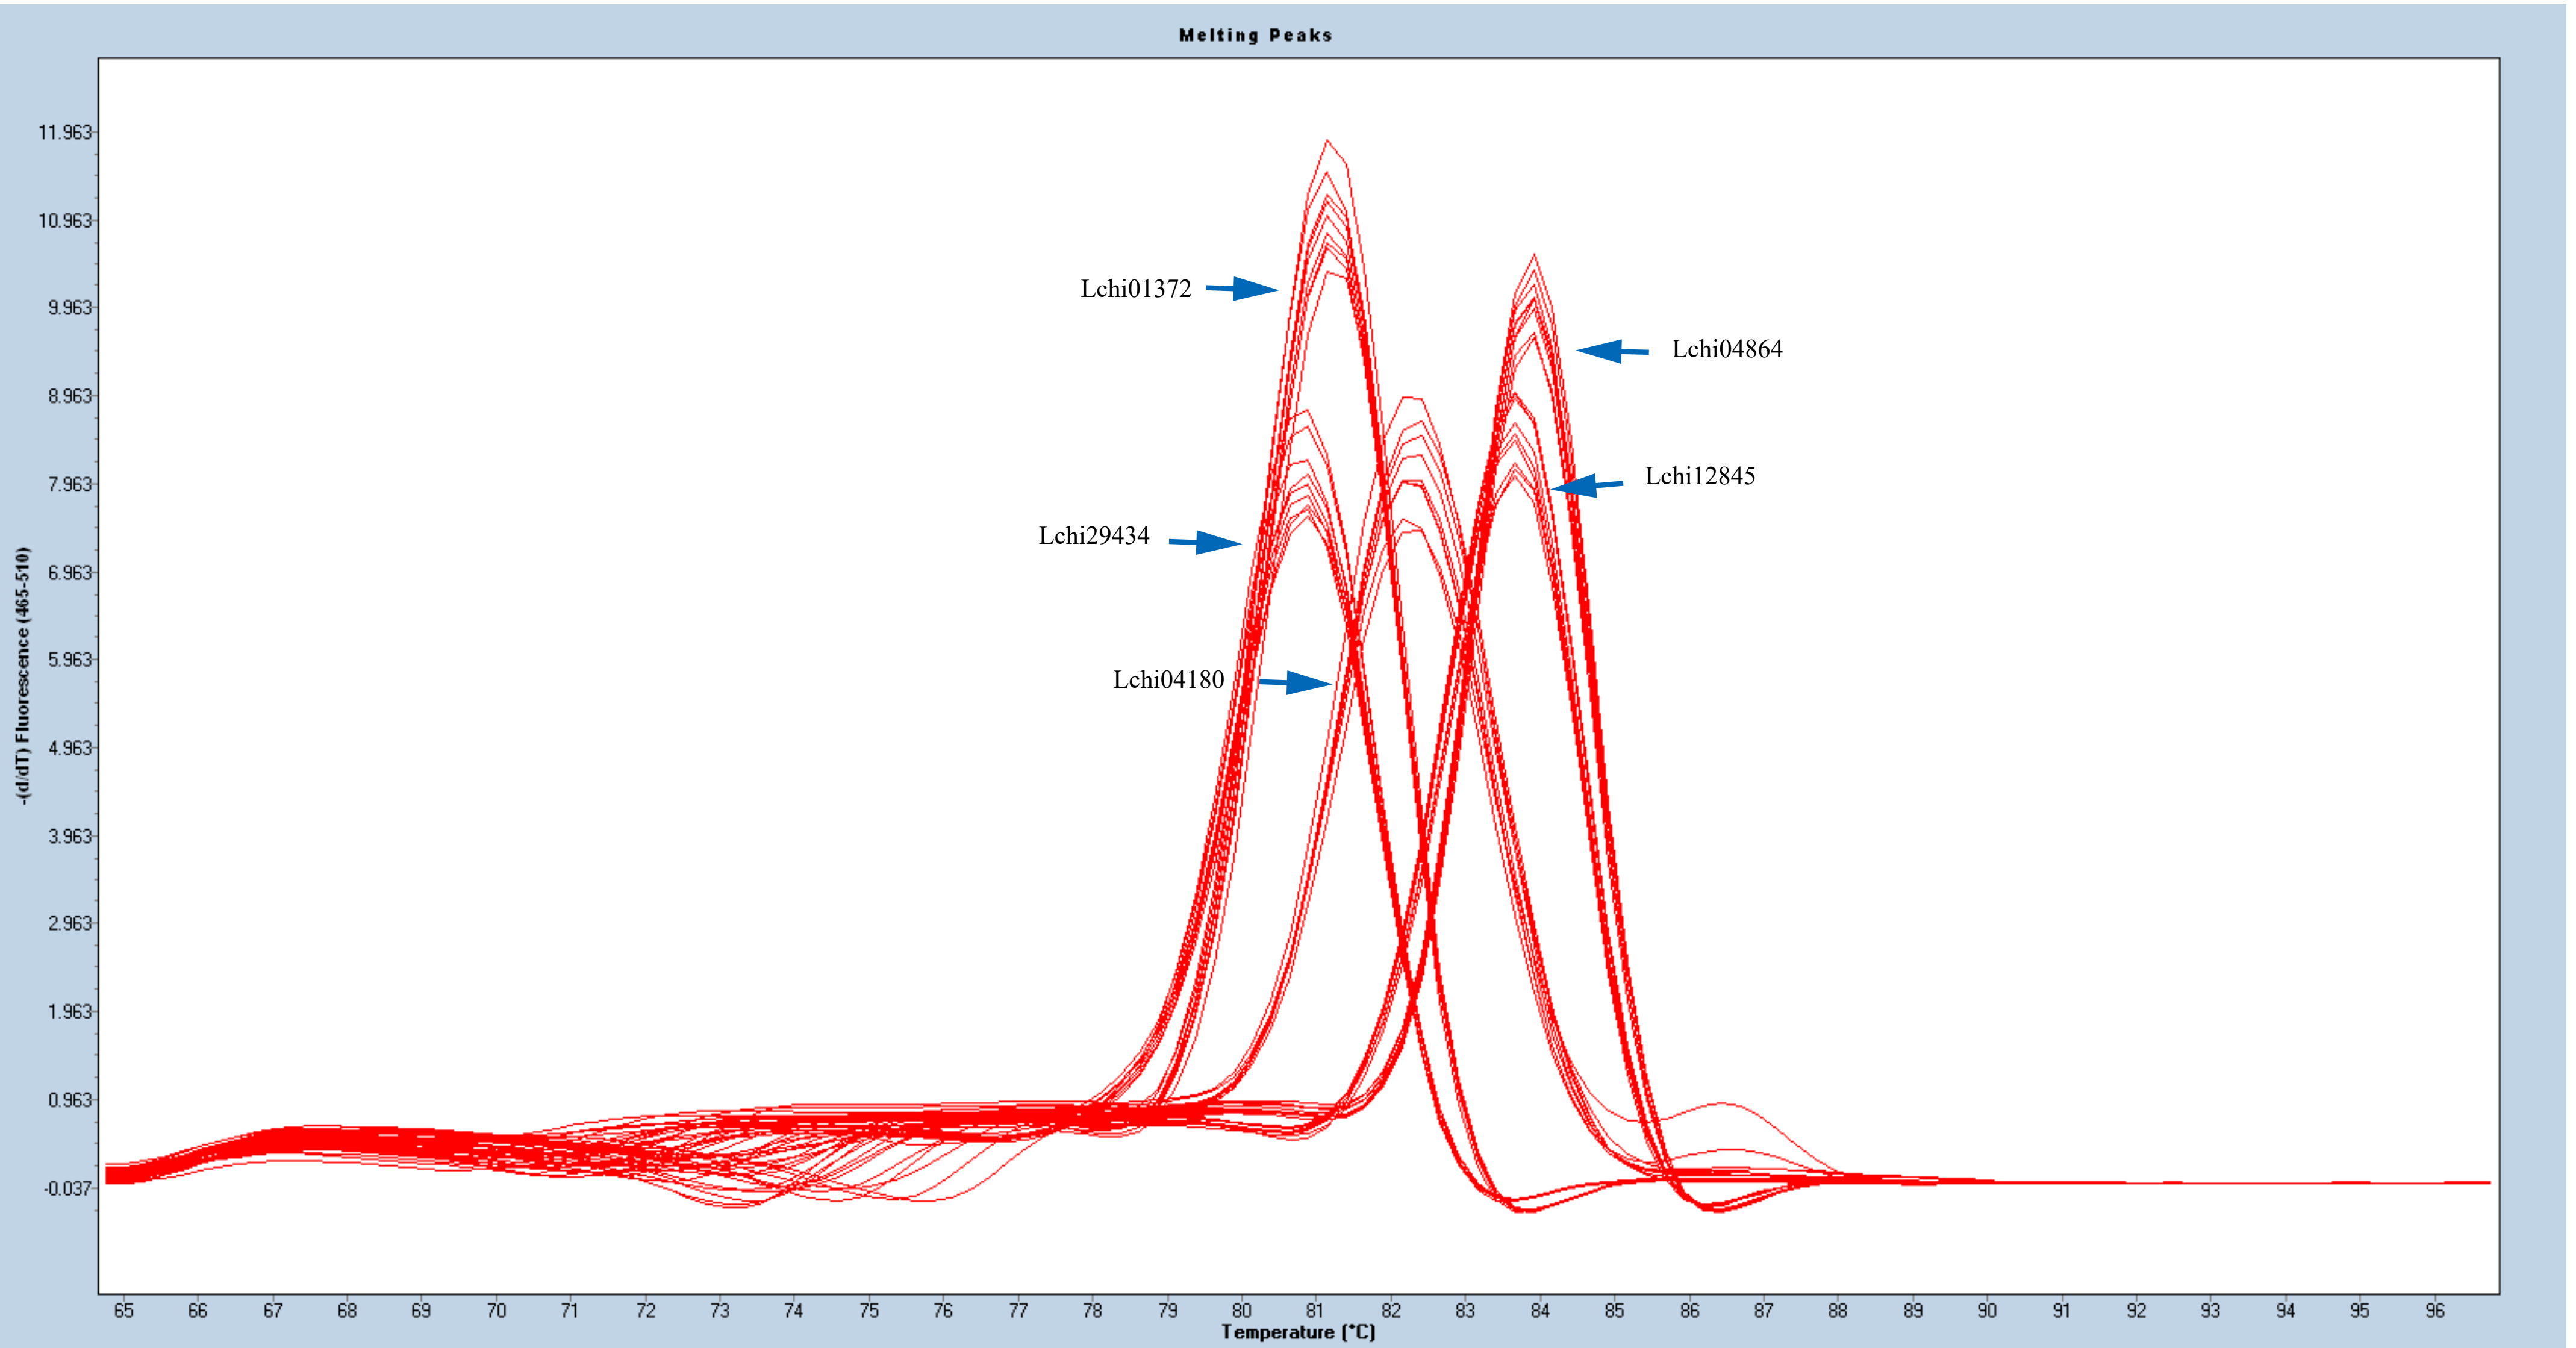

C

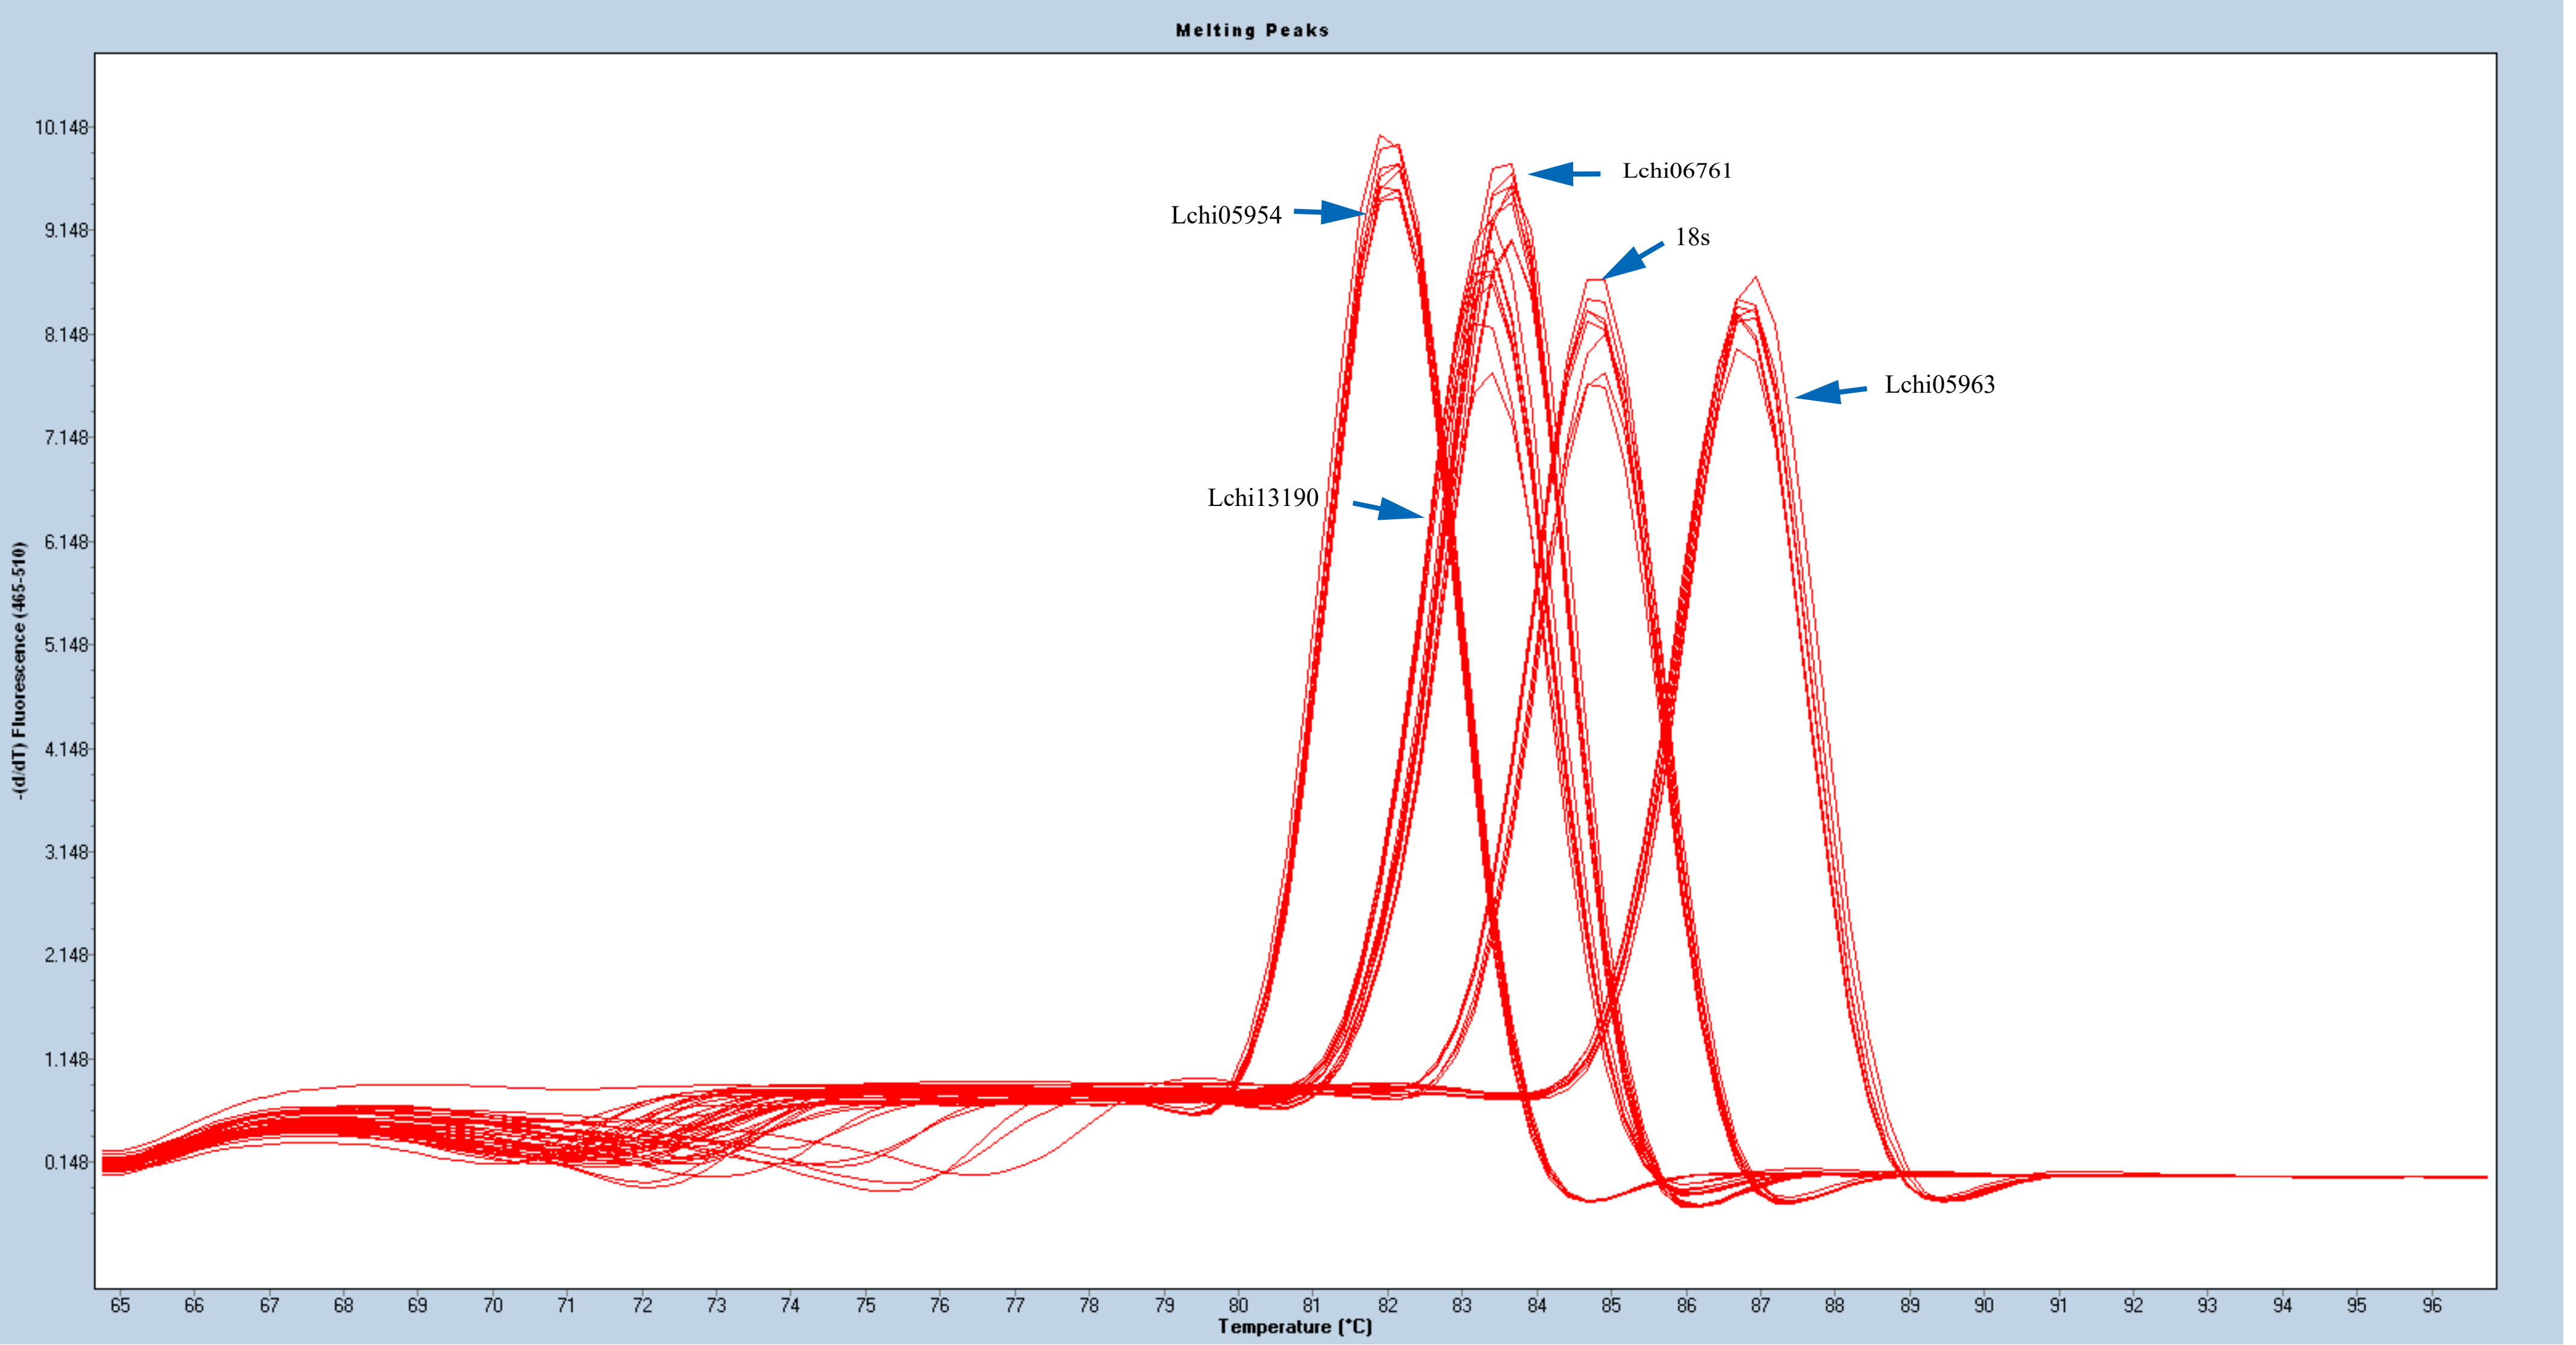

Supplement: s1 [file s1]

A

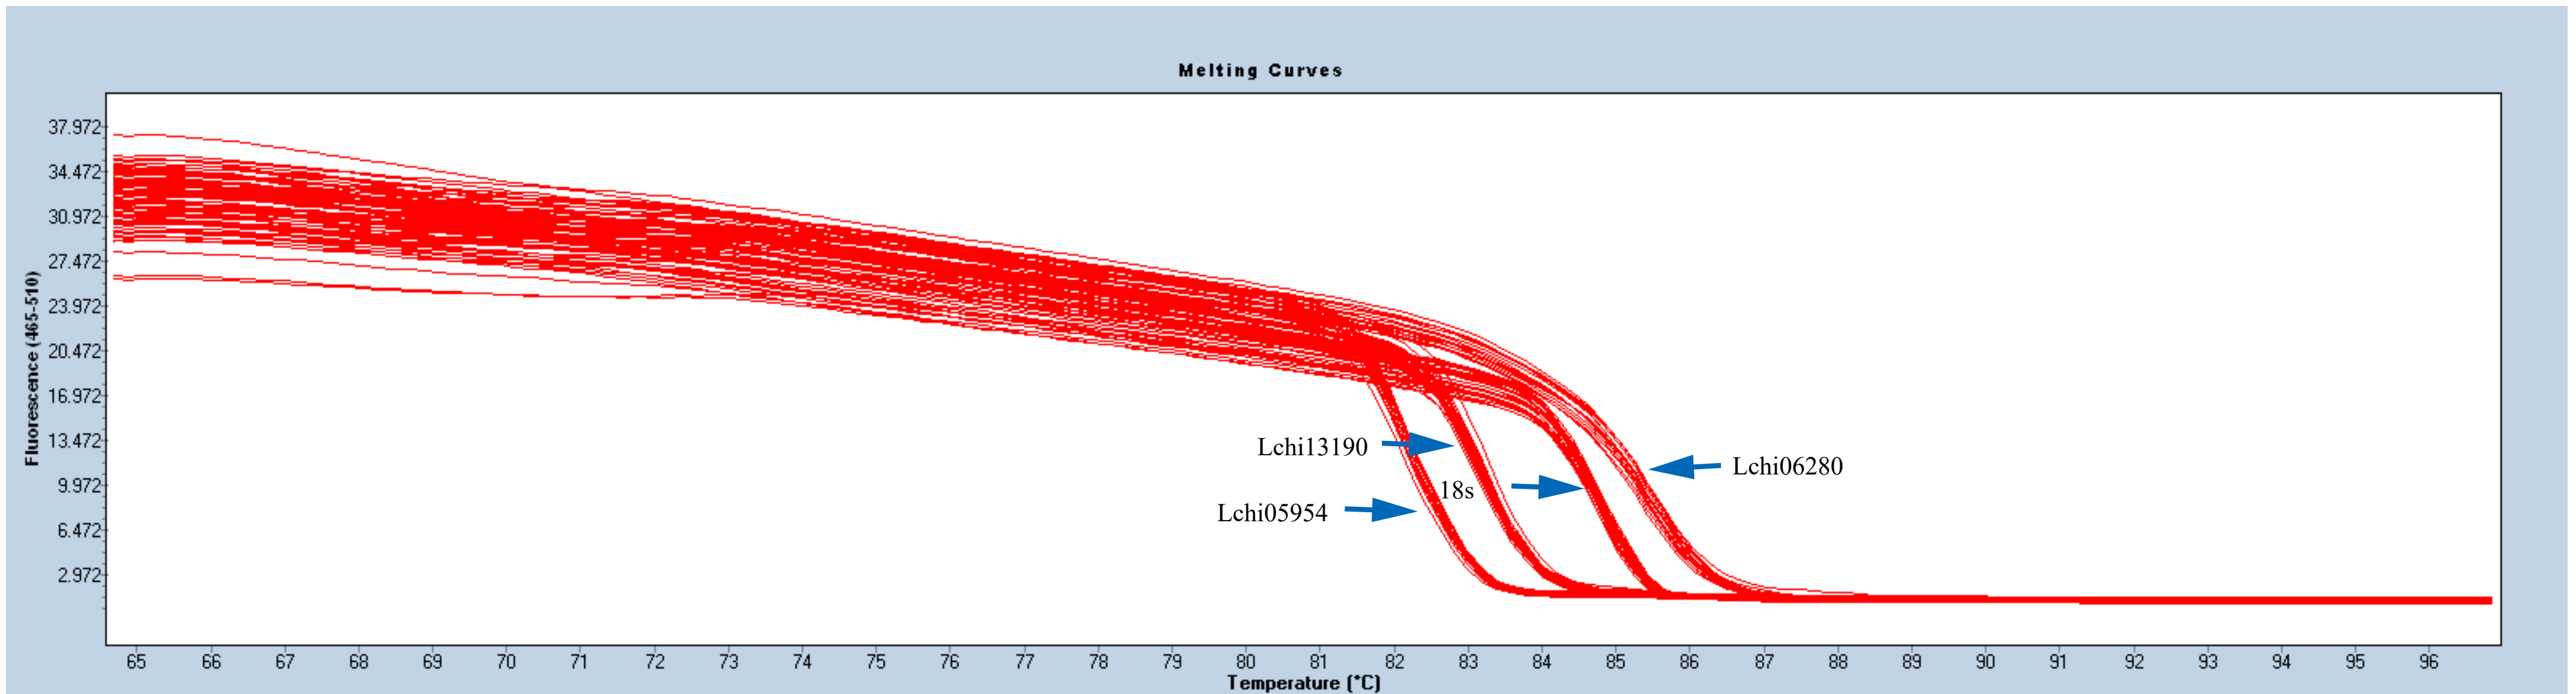

B

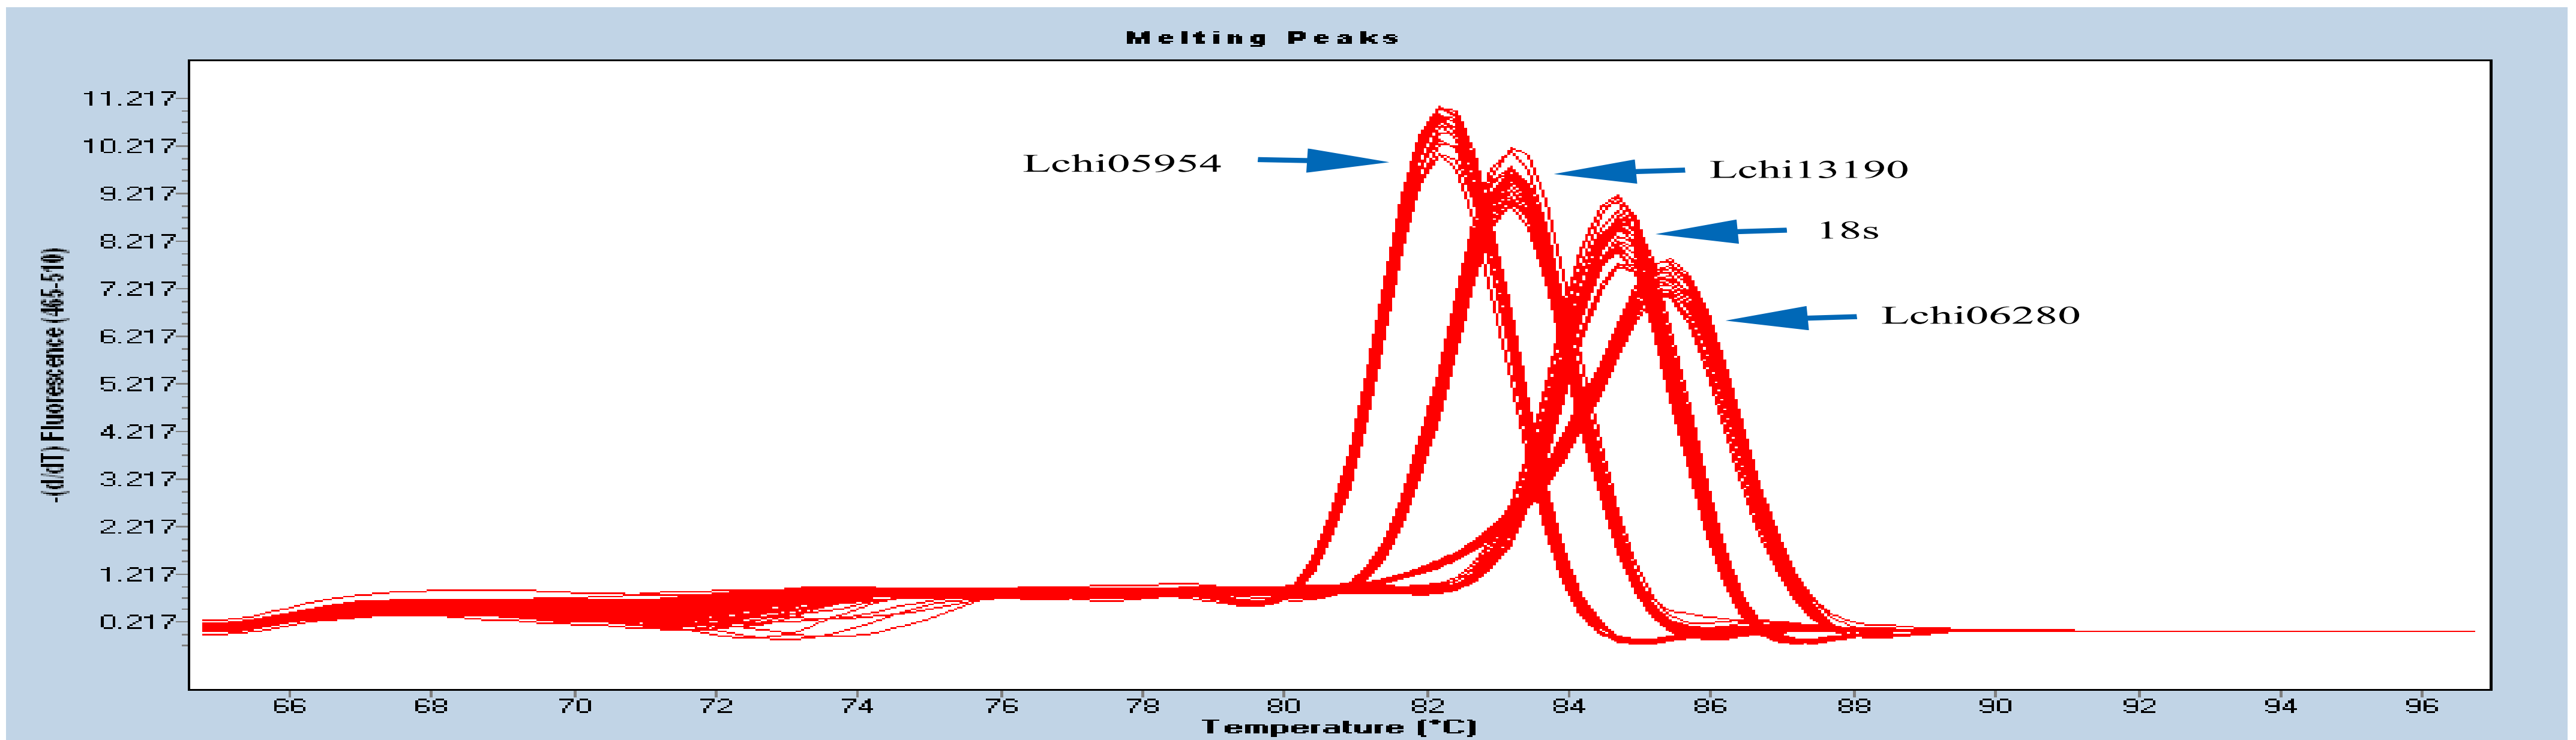

Supplement: s1 [file s1]

Tree scale: 1

**Clade I**

**Clade II**

**Clade III**

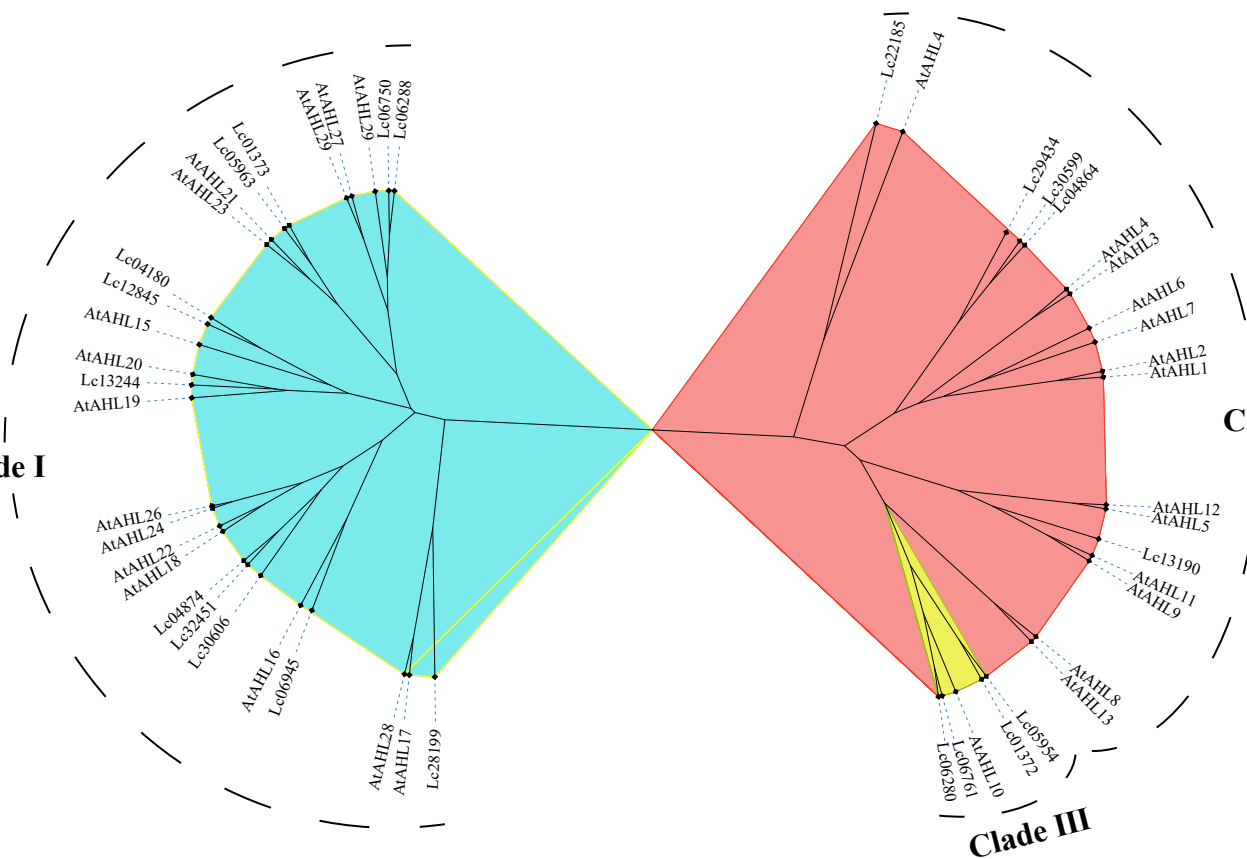

Supplement: s1 [file s1]
